# Supplementary material for: Mental Health Service Use in a Representative Sample of National Guard Soldiers
Source: Atypon-hosted journal article supplement (doi:10.1176/appi.ps.201300282), 2014-08-01

Table A4: Supplementary tables to examine differences in operationalization of insurance status and associations with mental health service use at 1-year follow-up among NG Soldiers, by deployment experience (n=1189)

| Characteristics                              | No Use of MH Services |    | Use of MH Services |    | P-value from X2 Test |
|----------------------------------------------|-----------------------|----|--------------------|----|----------------------|
|                                              | N                     | %  | N                  | %  |                      |
| <b>NO DEPLOYMENT EXPERIENCE (N=300)</b>      |                       |    |                    |    |                      |
| Insurance                                    |                       |    |                    |    |                      |
| No                                           | 52                    | 91 | 5                  | 8  | .2653                |
| Yes                                          | 203                   | 85 | 34                 | 14 | .2653                |
| Insurance                                    |                       |    |                    |    |                      |
| No                                           | 52                    | 91 | 5                  | 8  | .4399                |
| Any Insurance                                | 200                   | 85 | 33                 | 14 | .4399                |
| VA Insurance                                 | 3                     | 75 | 1                  | 25 | .4399                |
| <b>DEPLOYMENT EXPERIENCE (N=530)</b>         |                       |    |                    |    |                      |
| Insurance                                    |                       |    |                    |    |                      |
| No                                           | 33                    | 97 | 1                  | 2  | .0358                |
| Yes                                          | 324                   | 83 | 64                 | 16 | .0358                |
| Insurance                                    |                       |    |                    |    |                      |
| No                                           | 33                    | 97 | 1                  | 2  | .0790                |
| Any Insurance                                | 276                   | 84 | 52                 | 15 | .0790                |
| VA Insurance                                 | 48                    | 80 | 12                 | 20 | .0790                |
| <b>OEF/OIF DEPLOYMENT EXPERIENCE (N=359)</b> |                       |    |                    |    |                      |
| Insurance                                    |                       |    |                    |    |                      |
| No                                           | 19                    | 90 | 2                  | 9  | .3042                |
| Yes                                          | 361                   | 81 | 81                 | 18 | .3042                |
| Insurance                                    |                       |    |                    |    |                      |
| No                                           | 19                    | 90 | 2                  | 9  | .0073                |
| Any Insurance                                | 294                   | 84 | 54                 | 15 | .0073                |
| VA Insurance                                 | 67                    | 71 | 23                 | 28 | .0073                |

Table A5: Supplementary tables to examine differences in operationalization of insurance status and their associations with mental health service use at 1-year follow-up among NG Soldiers with mental health services need, by cumulative deployment status (n=226)

| Characteristics                              | No Use of MH Services |    | Use of MH Services |     | P-value from X2 Test |
|----------------------------------------------|-----------------------|----|--------------------|-----|----------------------|
|                                              | N                     | %  | N                  | %   |                      |
| <b>NO DEPLOYMENT EXPERIENCE (N=45)</b>       |                       |    |                    |     |                      |
| Insurance                                    |                       |    |                    |     |                      |
| No                                           | 9                     | 81 | 2                  | 18  | .2775                |
| Yes                                          | 19                    | 57 | 14                 | 42  | .2775                |
| Insurance                                    |                       |    |                    |     |                      |
| No                                           | 9                     | 81 | 2                  | 18  | .1438                |
| Any Insurance                                | 19                    | 59 | 13                 | 40  | .1438                |
| VA Insurance                                 | 0                     | 0  | 1                  | 100 | .1438                |
| <b>DEPLOYMENT EXPERIENCE (N=74)</b>          |                       |    |                    |     |                      |
| Insurance                                    |                       |    |                    |     |                      |
| No                                           | 7                     | 87 | 1                  | 12  | .1347                |
| Yes                                          | 37                    | 56 | 28                 | 43  | .1347                |
| Insurance                                    |                       |    |                    |     |                      |
| No                                           | 7                     | 87 | 1                  | 12  | .2828                |
| Any Insurance                                | 27                    | 57 | 20                 | 42  | .2828                |
| VA Insurance                                 | 10                    | 55 | 8                  | 44  | .2828                |
| <b>OEF/OIF DEPLOYMENT EXPERIENCE (N=107)</b> |                       |    |                    |     |                      |
| Insurance                                    |                       |    |                    |     |                      |
| No                                           | 1                     | 50 | 1                  | 50  | 1.0                  |
| Yes                                          | 66                    | 62 | 39                 | 37  | 1.0                  |
| Insurance                                    |                       |    |                    |     |                      |
| No                                           | 1                     | 50 | 1                  | 50  | .5239                |
| Any Insurance                                | 47                    | 66 | 24                 | 33  | .5239                |
| VA Insurance                                 | 19                    | 55 | 15                 | 44  | .5239                |

FIGURE 2: Mental Health Services Use at 1-Year Follow-up by Number of mental health conditions at baseline assessment (n=225).

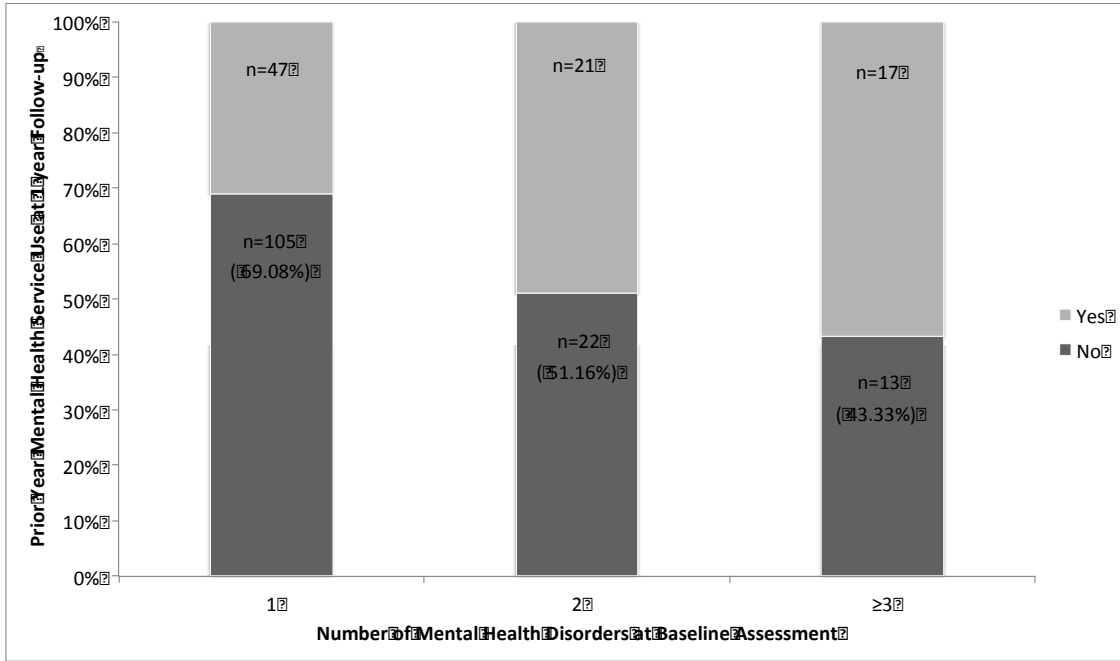

Supplement: appi.ps.201300282.ds001.pdf [file appi.ps.201300282.ds001.pdf]
